# Supplementary material for: Remote ischaemic pre- and delayed postconditioning – similar degree of cardioprotection but distinct mechanisms
Source: PubMed Central journal article supplement (PMC3470925; doi:10.1113/expphysiol.2012.064923), 2012-03-16
Supplement: eph0097-0908-SD1.pdf [file eph0097-0908-SD1.pdf]

## Supplementary Table

|                                    | Variable | Basal  | Pre-<br>ischaemia | End of<br>ischaemia | Reperfusion (min) |        |        |        |
|------------------------------------|----------|--------|-------------------|---------------------|-------------------|--------|--------|--------|
|                                    |          |        |                   |                     | 30                | 60     | 90     | 120    |
| <b>Experiment 1</b>                |          |        |                   |                     |                   |        |        |        |
| Sham-Rlc (n=8)                     | MAP      | 108±6  | 106±6             | 105±7               | 95±7              | 89±6   | 87±5   | 87±5   |
|                                    | HR       | 422±16 | 412±11            | 421±12              | 436±15            | 445±10 | 446±9  | 442±8  |
| RPrec (n=12)                       | MAP      | 102±5  | 102±7             | 99±6                | 96±5              | 90±5   | 87±6   | 82±4   |
|                                    | HR       | 418±8  | 421±11            | 432±12              | 428±12            | 428±12 | 428±13 | 424±9  |
| RPerc (n=10)                       | MAP      | 104±5  | 99±5              | 97±3                | 92±2              | 88±6   | 90±5   | 86±4   |
|                                    | HR       | 429±10 | 429±10            | 438±12              | 425±14            | 444±12 | 436±15 | 440±14 |
| RPerc/Post (n=10)                  | MAP      | 99±7   | 103±7             | 98±6                | 97±5              | 95±5   | 88±5   | 91±5   |
|                                    | HR       | 410±16 | 412±16            | 411±14              | 398±16            | 395±16 | 411±14 | 419±13 |
| RPost10' (n=10)                    | MAP      | 101±2  | 106±2             | 91±11               | 87±6              | 89±5   | 82±4   | 89±3   |
|                                    | HR       | 412±14 | 402±14            | 421±7               | 413±16            | 422±15 | 418±16 | 434±11 |
| RPost30' (n=10)                    | MAP      | 104±18 | 101±18            | 95±6                | 88±4              | 86±4   | 84±5   | 84±4   |
|                                    | HR       | 409±12 | 409±14            | 419±11              | 415±13            | 422±13 | 412±17 | 417±14 |
| <b>Experiment 2</b>                |          |        |                   |                     |                   |        |        |        |
| Vehicle (n=8)                      | MAP      | 99±8   | 96±8              | 93±7                | 90±6              | 87±6   | 84±5   | 87±4   |
|                                    | HR       | 405±17 | 405±17            | 421±15              | 428±13            | 431±9  | 435±11 | 422±5  |
| Capsaicin (n=10)                   | MAP      | 104±3  | 105±2             | 92±4                | 88±3              | 90±7   | 88±6   | 86±4   |
|                                    | HR       | 402±14 | 413±12            | 407±13              | 405±15            | 422±18 | 427±18 | 425±17 |
| Capsaicin<br>25'ischaemia (n=10)   | MAP      | 99±5   | 95±5              | 98±4                | 82±3              | 82±3   | 84±3   | 76±3   |
|                                    | HR       | 407±14 | 405±14            | 421±13              | 409±12            | 432±12 | 426±11 | 433±11 |
| Capsaicin<br>10'reperfusion (n=10) | MAP      | 101±4  | 99±4              | 95±3                | 79±4              | 79±3   | 81±3   | 82±3   |
|                                    | HR       | 417±9  | 413±9             | 436±9               | 414±13            | 424±11 | 429±12 | 435±11 |

### Supplementary Table (contd)

| <b>Experiment 3</b>             |     |        |        |        |        |        |        |        |
|---------------------------------|-----|--------|--------|--------|--------|--------|--------|--------|
| Sham-Rlc (n=6)                  | MAP | 101±9  | 99±9   | 95±10  | 85±4   | 84±3   | 82±5   | 87±5   |
|                                 | HR  | 413±20 | 413±20 | 418±17 | 428±12 | 426±12 | 430±14 | 443±7  |
| Denervation+<br>Sham- Rlc (n=6) | MAP | 96±3   | 96±5   | 92±4   | 86±1   | 80±4   | 75±3   | 80±7   |
|                                 | HR  | 415±8  | 415±9  | 442±13 | 420±14 | 425±19 | 430±23 | 452±11 |
| RPrec (n=12)                    | MAP | 102±5  | 102±7  | 99±6   | 96±5   | 90±5   | 87±6   | 82±4   |
|                                 | HR  | 418±8  | 421±11 | 432±12 | 428±12 | 428±12 | 428±13 | 424±9  |
| Denervation+RPrec<br>(n=10)     | MAP | 106±4  | 99±4   | 92±5   | 85±4   | 87±3   | 88±3   | 86±4   |
|                                 | HR  | 417±13 | 404±19 | 436±11 | 427±18 | 427±17 | 440±18 | 441±16 |
| RPost10' (n=10)                 | MAP | 101±2  | 106±2  | 91±11  | 87±6   | 89±5   | 82±4   | 89±3   |
|                                 | HR  | 412±14 | 402±14 | 421±7  | 413±16 | 422±15 | 418±16 | 434±11 |
| Denervation+<br>RPost10' (n=10) | MAP | 109±3  | 99±2   | 92±4   | 88±3   | 85±3   | 88±3   | 81±4   |
|                                 | HR  | 411±28 | 408±14 | 419±12 | 413±13 | 419±11 | 422±10 | 432±9  |
| <b>Experiment 4</b>             |     |        |        |        |        |        |        |        |
| Sham-Rlc (n=10)                 | MAP | 102±5  | 97±5   | 94±5   | 92±5   | 87±6   | 92±4   | 88±4   |
|                                 | HR  | 422±17 | 406±17 | 413±17 | 426±23 | 424±22 | 437±16 | 439±15 |
| Vagotomy +Sham-<br>Rlc (n=8)    | MAP | 88±6   | 97±4   | 89±3   | 102±7  | 104±7  | 98±6   | 94±6   |
|                                 | HR  | 432±21 | 434±11 | 451±11 | 457±13 | 451±14 | 450±8  | 451±9  |
| RPrec (n=12)                    | MAP | 102±5  | 102±7  | 99±6   | 96±5   | 90±5   | 87±6   | 82±4   |
|                                 | HR  | 418±8  | 421±11 | 432±12 | 428±12 | 428±12 | 428±13 | 424±9  |
| Vagotomy+RPrec<br>(n=10)        | MAP | 99±3   | 115±7  | 114±8  | 103±7  | 96±6   | 98±4   | 96±4   |
|                                 | HR  | 431±12 | 465±4  | 472±5  | 453±9  | 456±5  | 459±3  | 458±3  |
| RPost10' (n=10)                 | MAP | 101±2  | 106±2  | 91±11  | 87±6   | 89±5   | 82±4   | 89±3   |
|                                 | HR  | 412±14 | 402±14 | 421±7  | 413±16 | 422±15 | 418±16 | 434±11 |
| Vagotomy+RPost10'<br>(n=10)     | MAP | 104±5  | 101±5  | 95±6   | 104±8  | 98±7   | 93±5   | 90±5   |
|                                 | HR  | 413±14 | 426±14 | 429±15 | 419±16 | 418±15 | 423±15 | 420±15 |
| Sham-IPc (n=7)                  | MAP | 102±6  | 99±6   | 97±7   | 92±3   | 95±3   | 85±4   | 81±5   |
|                                 | HR  | 430±14 | 444±6  | 432±6  | 445±8  | 441±7  | 445±7  | 444±8  |
| Vagotomy+IPc (n=10)             | MAP | 100±5  | 104±8  | 101±6  | 96±6   | 91±4   | 87±5   | 88±6   |
|                                 | HR  | 433±12 | 460±10 | 461±10 | 464±9  | 464±10 | 463±11 | 459±10 |

Abbreviations: Rlc – remote ischaemic conditioning; RPrec – remote ischaemic preconditioning; RPerc – remote ischaemic perconditioning; RPost – remote ischaemic postconditioning; IPc – myocardial ischaemic preconditioning; HR – heart rate (beats/min); MAP – mean arterial blood pressure (mmHg).
